# Supplementary material for: Dynamics of Plasma and Urinary Extracellular DNA in Acute Kidney Injury
Source: MDPI journal article supplement (doi:10.3390/ijms23063402), 2022-03-21
Supplement: s1 [file s1]

Supplementary Table S1: Relation between kidney functions markers and concentrations of ecDNA in plasma and urine.

| Variable          | Plasma ecDNA      | Plasma ncDNA                     | Plasma mtDNA                    | Urinary ecDNA    | Urinary ncDNA    | Urinary mtDNA                   |
|-------------------|-------------------|----------------------------------|---------------------------------|------------------|------------------|---------------------------------|
| Plasma creatinine | r=-0.02<br>p=0.91 | <b>r=-0.36</b><br><b>p=0.009</b> | <b>r=-0.27</b><br><b>p=0.05</b> | r=0.18<br>p=0.20 | r=0.25<br>p=0.09 | <b>r=0.42</b><br><b>p=0.002</b> |
| BUN               | r=0.06<br>p=0.97  | r=-0.23<br>p=0.10                | r=-0.17<br>p=0.22               | r=0.17<br>p=0.25 | r=0.27<br>p=0.06 | r=0.22<br>p=0.12                |
